# Supplementary material for: Progressively De-Differentiated Pancreatic Cancer Cells Shift from Glycolysis to Oxidative Metabolism and Gain a Quiescent Stem State
Source: MDPI journal article supplement (doi:10.3390/cells9071572), 2020-06-28
Supplement: s1 [file s1]

**A**

**CSCs 1 day**

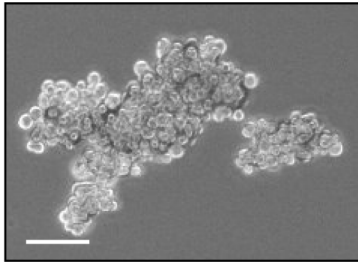

**CSCs 4 days**

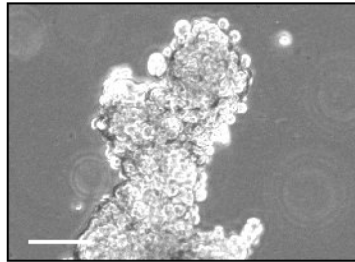

**CSCs 7 days**

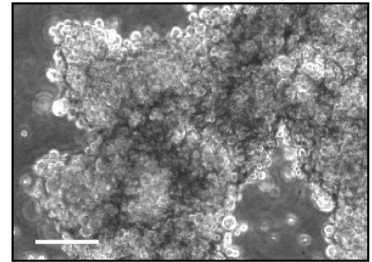

**B**

**P cells**

**CSCs 8 wk**

**PaCa44**

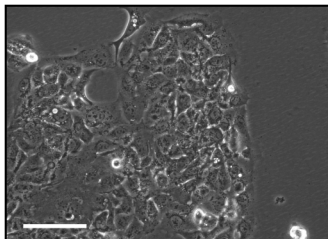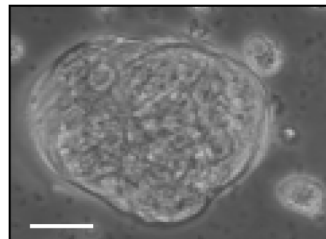

**PaCa3**

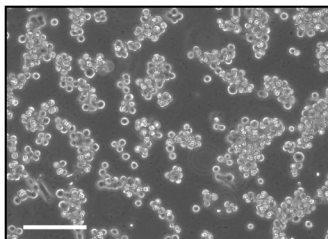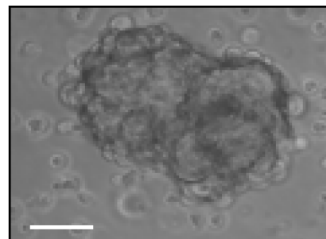

**PC1J**

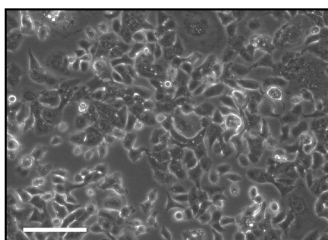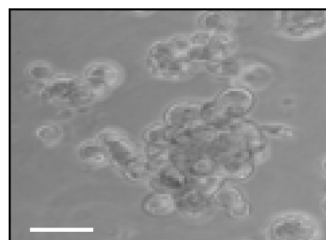

**C**

**CSCs 12 wk**

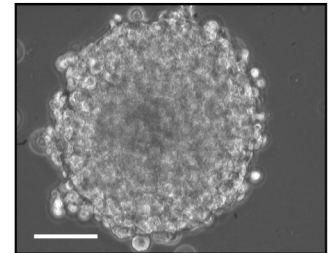

**Supplementary Fig. 1**

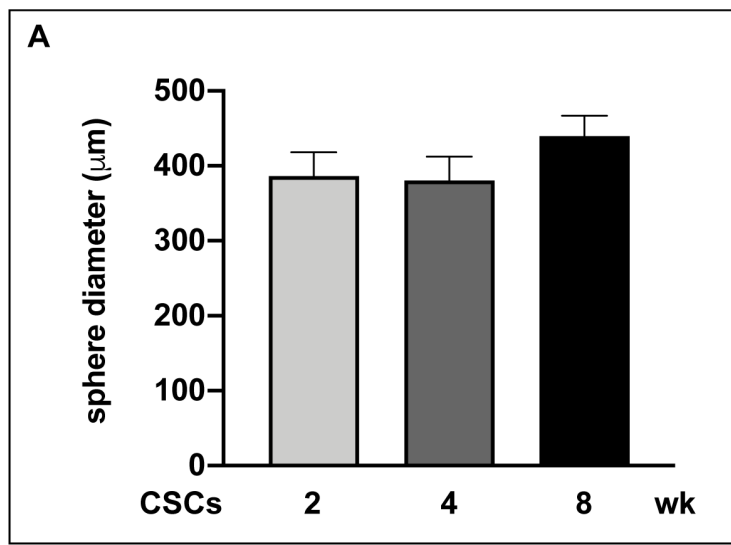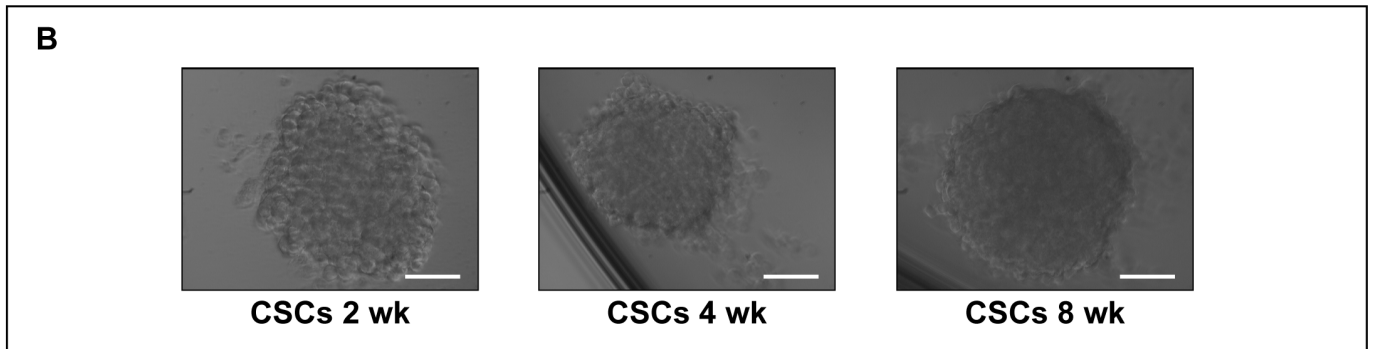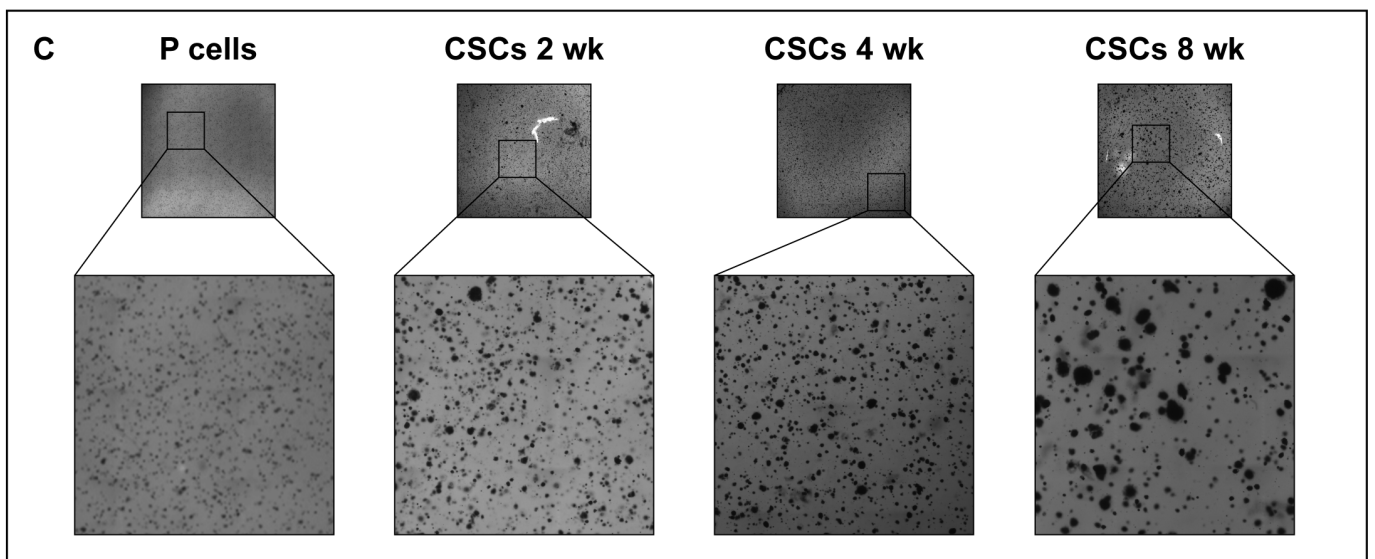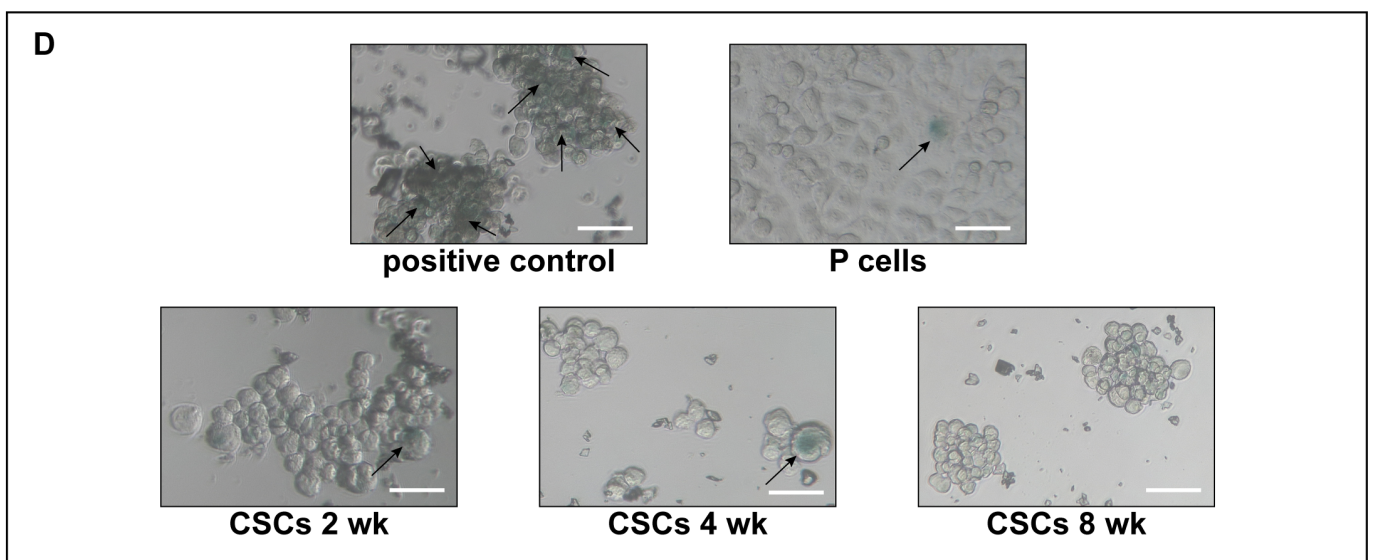

Supplementary Fig. 2

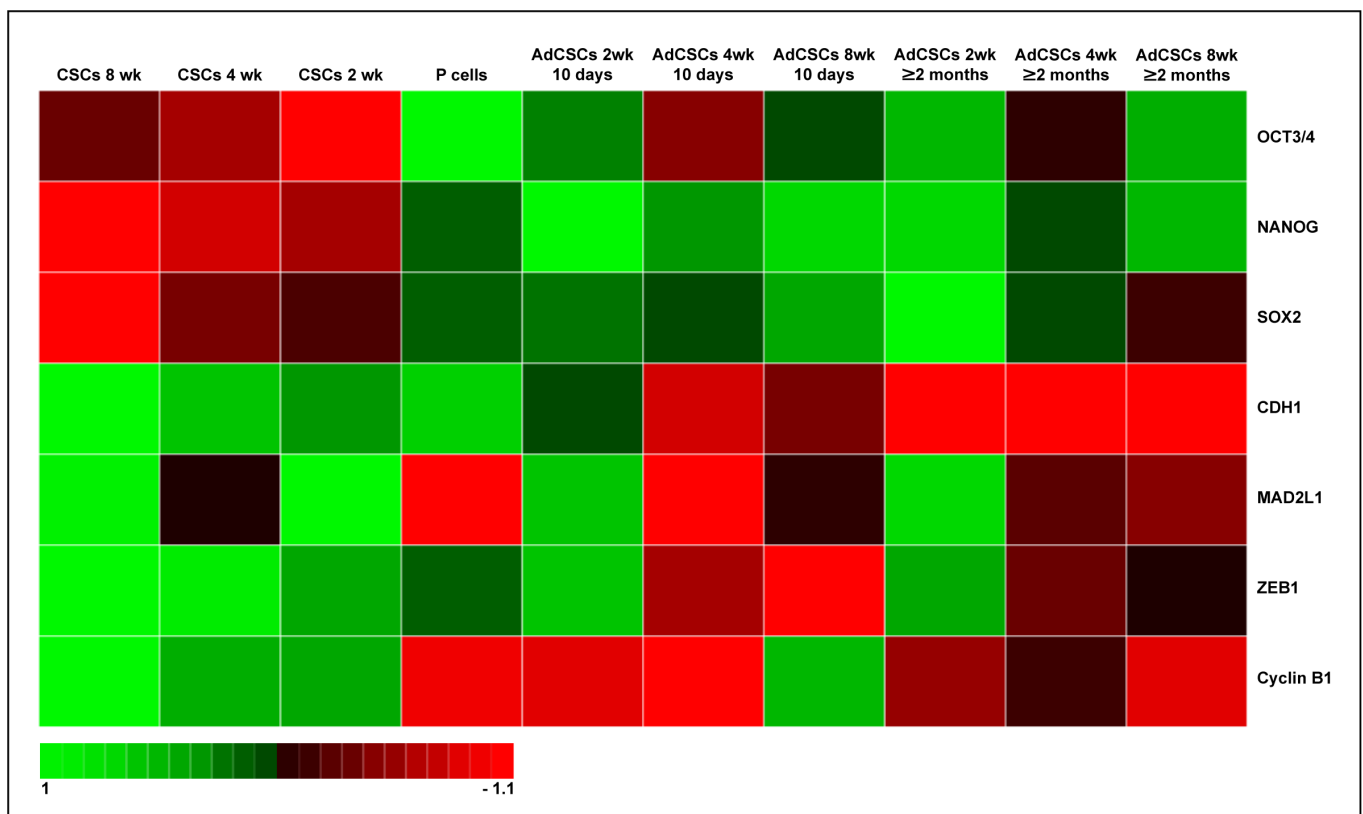

**Supplementary Fig. 3**

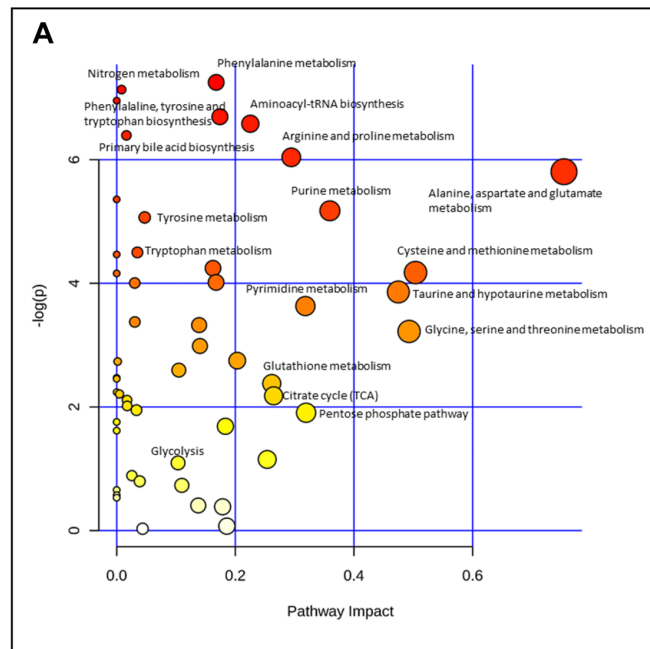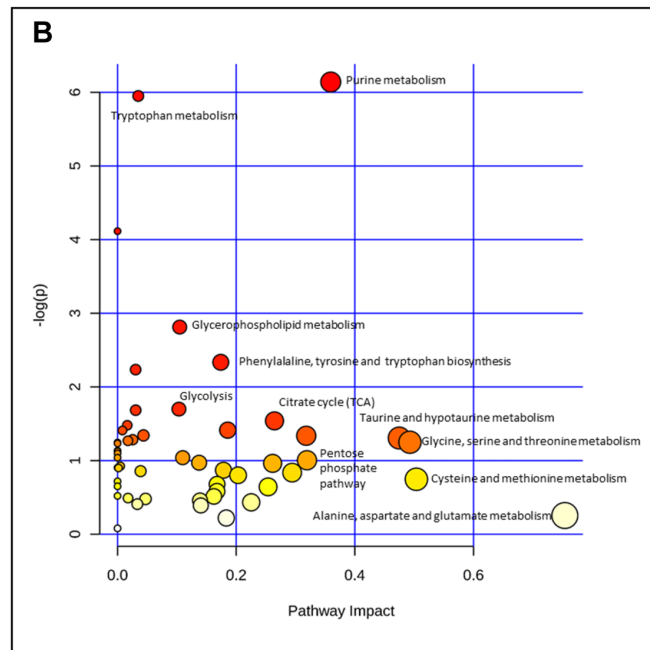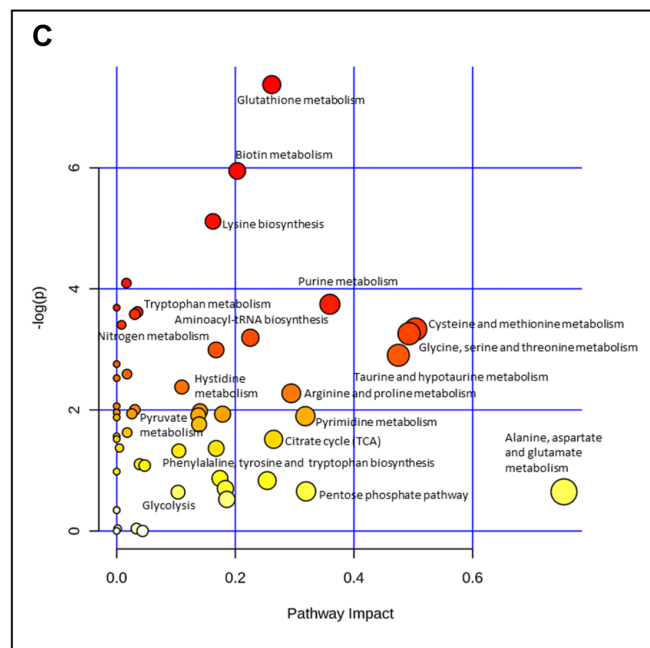

**Supplementary Fig. 4**

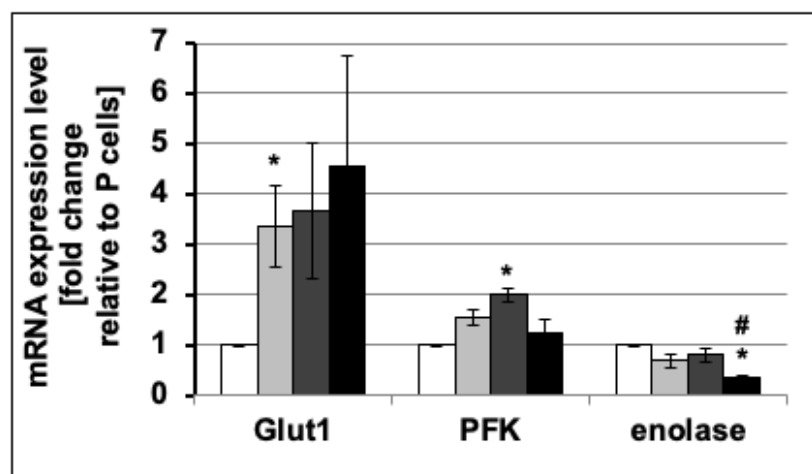

**Supplementary Fig. 5**

### Supplementary Table 1

Analysis of mRNA expression levels of stem markers (SOX2, NANOG, and OCT3/4) and of quiescence markers (MAD2L1, Cyclin B1, and RPLP0) in the three PDAC cell lines PaCa44, PaCa3, and PC1J cultured in the SsM for 4 and 8 weeks.

Values are reported as fold change relative to parental cells and are the means ( $\pm$  SE) of three independent biological replicates.

Statistical legend:  $p < 0.05$  (\*) parental cells *versus* CSCs.

|                    | PaCa44           |                  | PaCa3            |                   | PC1J             |                  |
|--------------------|------------------|------------------|------------------|-------------------|------------------|------------------|
|                    | CSCs 4 weeks     | CSCs 8 weeks     | CSCs 4 weeks     | CSCs 8 weeks      | CSCs 4 weeks     | CSCs 8 weeks     |
| Stem markers       |                  |                  |                  |                   |                  |                  |
| SOX2               | 2.7 $\pm$ 0.06 * | 2.3 $\pm$ 0.56 * | 5.9 $\pm$ 3.16   | 8.5 $\pm$ 3.60    | 1.6 $\pm$ 0.33   | 2.0 $\pm$ 0.78   |
| NANOG              | 1.5 $\pm$ 0.66   | 1.9 $\pm$ 0.50   | 7.0 $\pm$ 3.85   | 10.2 $\pm$ 4.59   | 1.7 $\pm$ 0.52   | 2.2 $\pm$ 0.99   |
| OCT3/4             | 1.4 $\pm$ 0.39   | 2.1 $\pm$ 0.36 * | 5.4 $\pm$ 2.59   | 10.4 $\pm$ 1.26 * | 1.7 $\pm$ 0.22 * | 2.0 $\pm$ 0.41 * |
| Quiescence markers |                  |                  |                  |                   |                  |                  |
| MAD2L1             | 0.4 $\pm$ 0.04 * | 0.8 $\pm$ 0.02   | 0.5 $\pm$ 0.02 * | 1.3 $\pm$ 0.39    | 1.1 $\pm$ 0.15   | 2.7 $\pm$ 0.22 * |
| Cyclin B1          | 0.2 $\pm$ 0.06 * | 0.7 $\pm$ 0.08 * | 0.2 $\pm$ 0.04 * | 0.9 $\pm$ 0.19    | 1.0 $\pm$ 0.40   | 2.0 $\pm$ 0.45   |
| RPLP0              | 1.2 $\pm$ 0.3    | 0.6 $\pm$ 0.19 * | 0.3 $\pm$ 0.03 * | 0.6 $\pm$ 0.22    | 1.3 $\pm$ 0.32   | 0.6 $\pm$ 0.04 * |
